# Supplementary material for: Comparing the Similarity of Different Groups of Bacteria to the Human Proteome
Source: PubMed Central journal article supplement (PMC3338800; doi:10.1371/journal.pone.0034007), 2012-04-25

# Complete cellular localization results

The similarity to the human proteome of the pathogens versus the nonpathogens is shown for proteins having different subcellular localizations.

## Proteins with cytoplasmic localization in Gram-negative bacteria

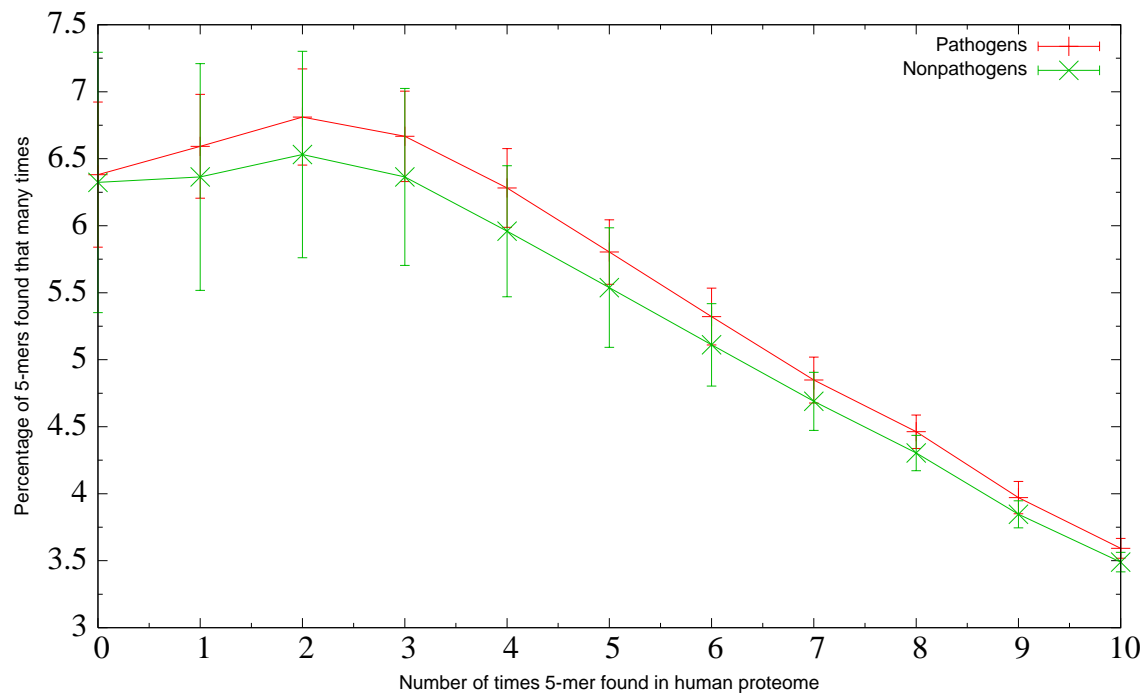

## Proteins with cytoplasmic membrane localization in Gram-negative bacteria

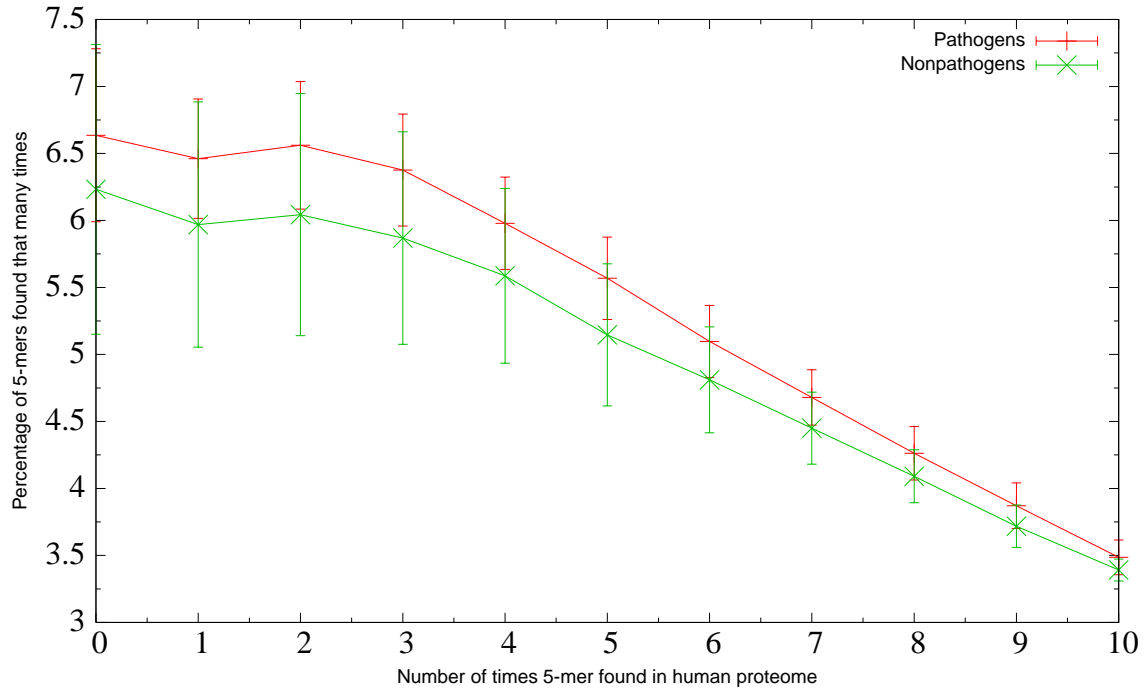

## Proteins with extracellular localization in Gram-negative bacteria

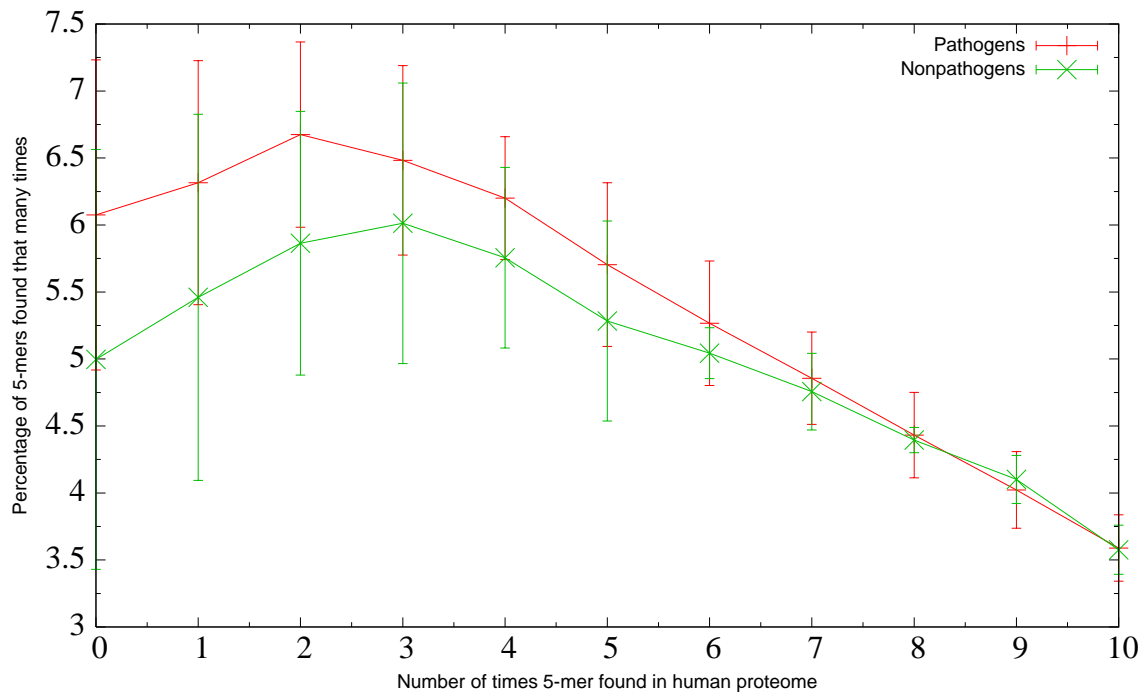

## Proteins with outer membrane localization in Gram-negative bacteria

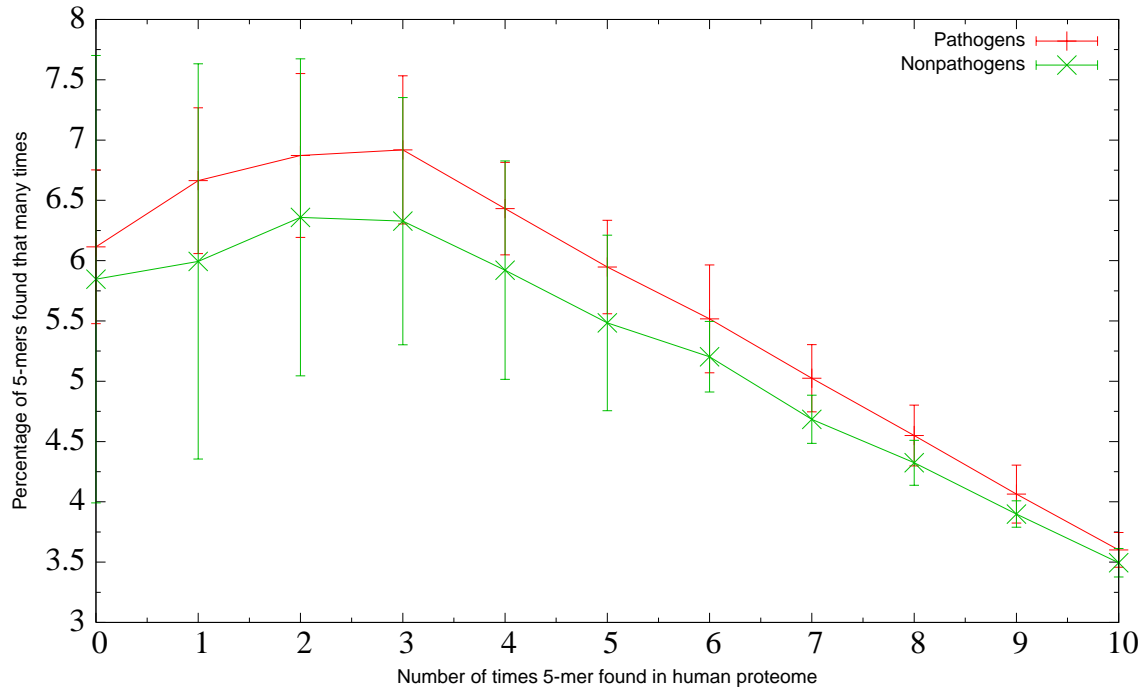

## Proteins with periplasmic localization in Gram-negative bacteria

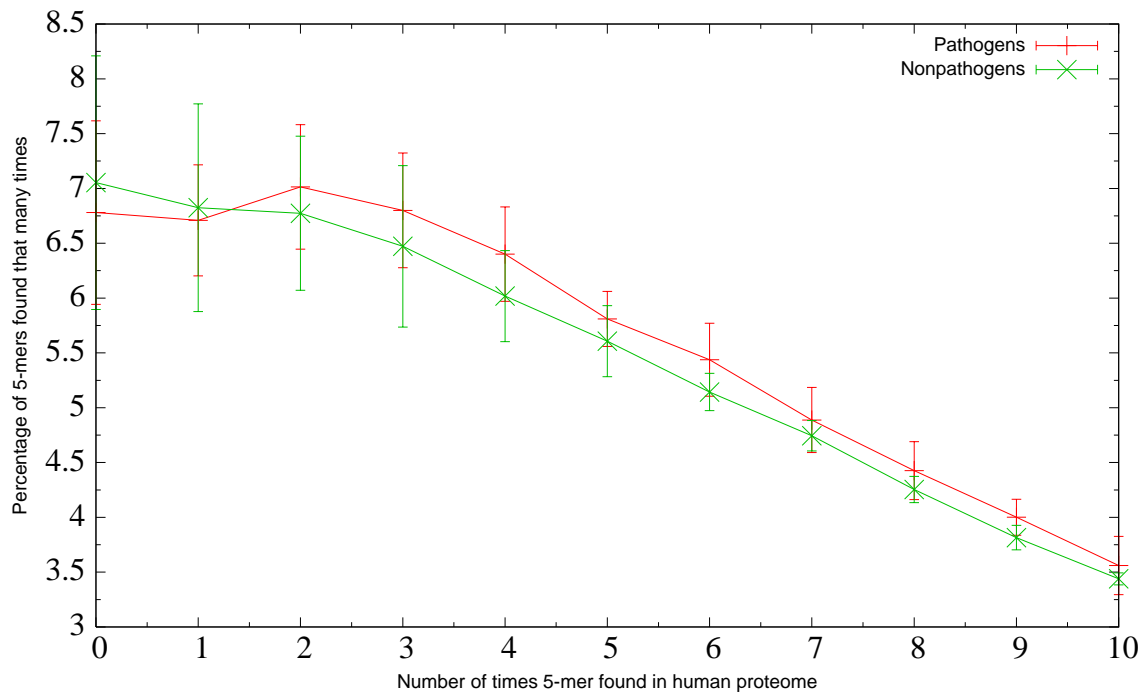

## Proteins with cell wall localization in Gram-positive bacteria

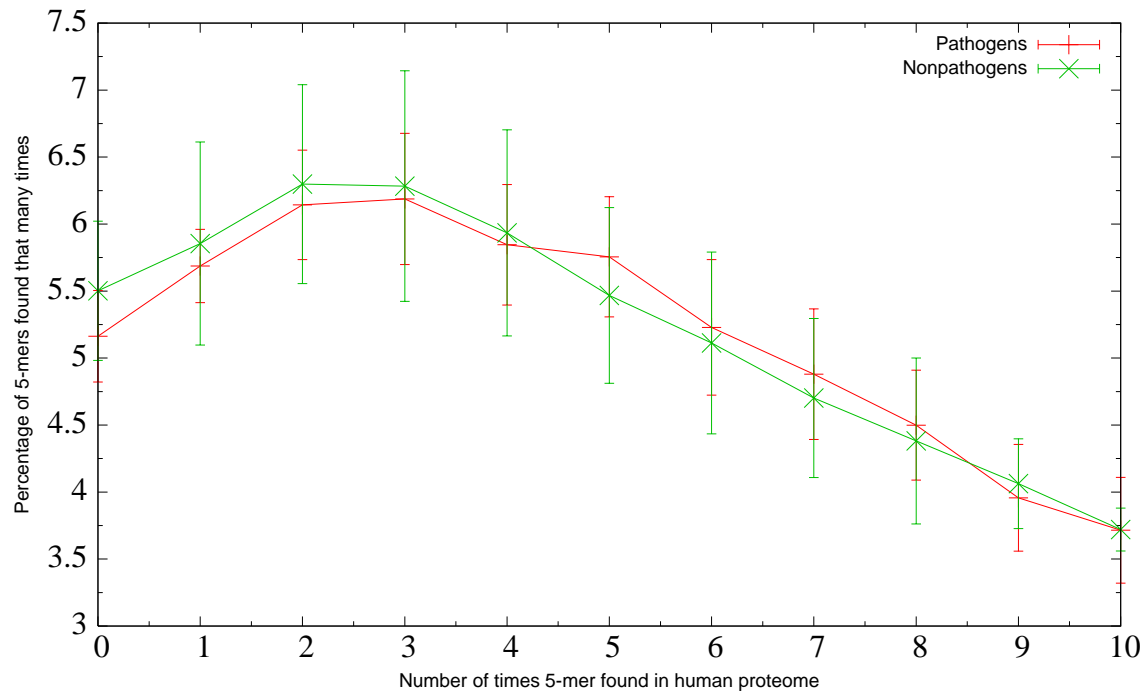

## Proteins with cytoplasmic localization in Gram-positive bacteria

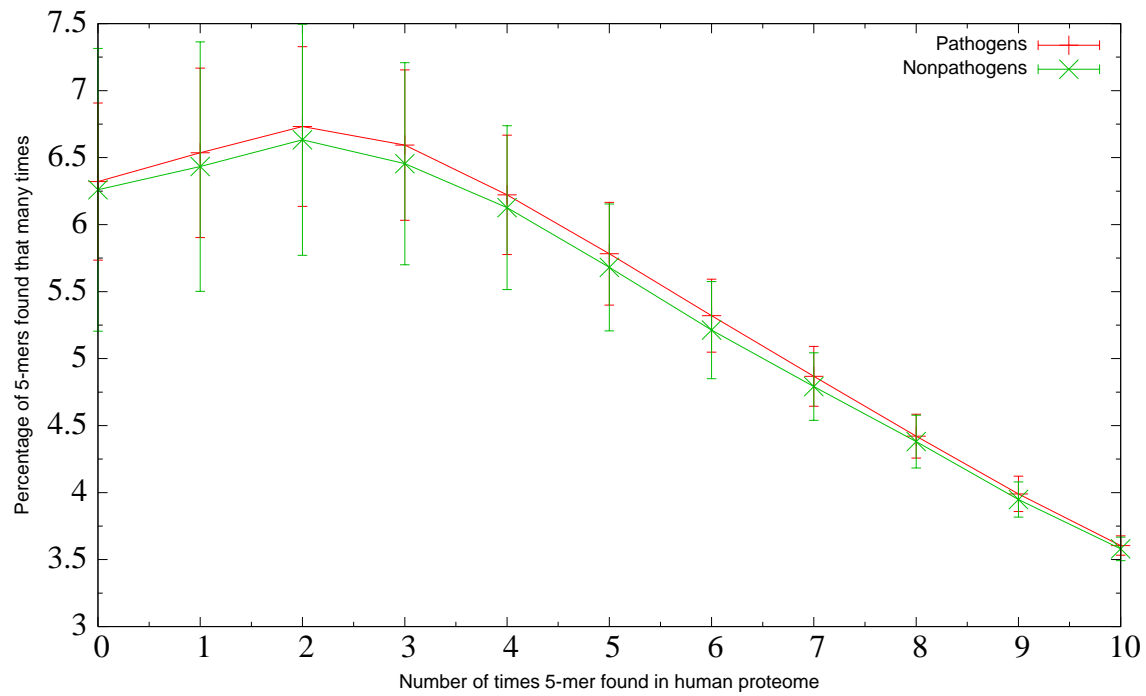

## Proteins with cytoplasmic membrane localization in Gram-positive bacteria

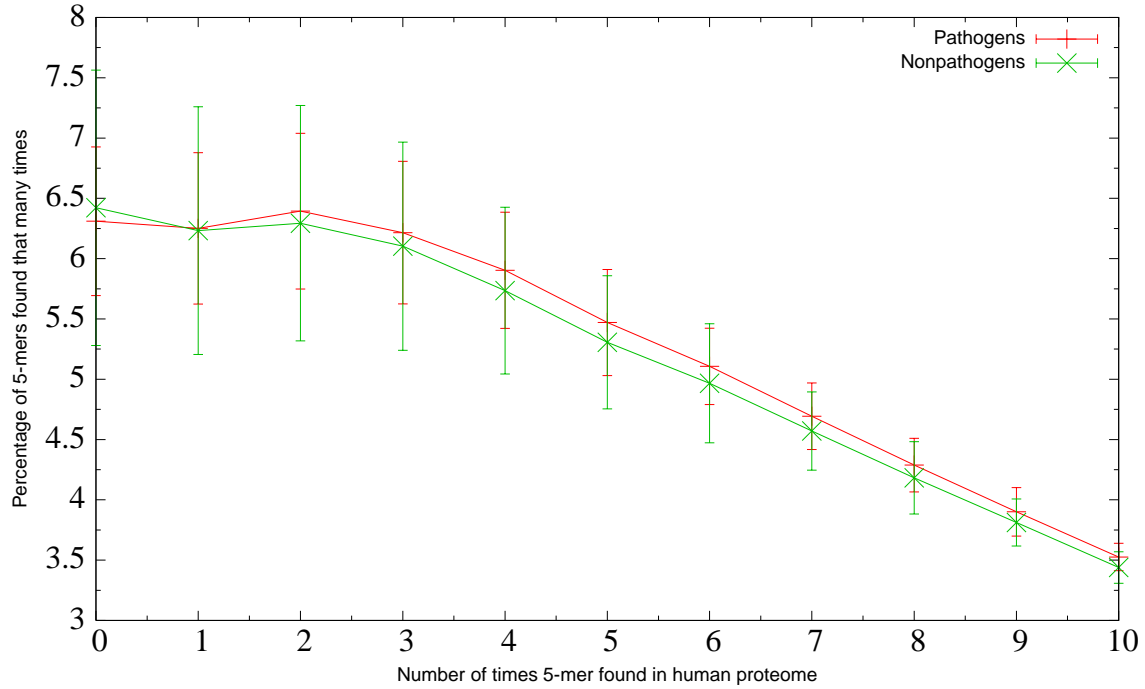

## Proteins with extracellular localization in Gram-positive bacteria

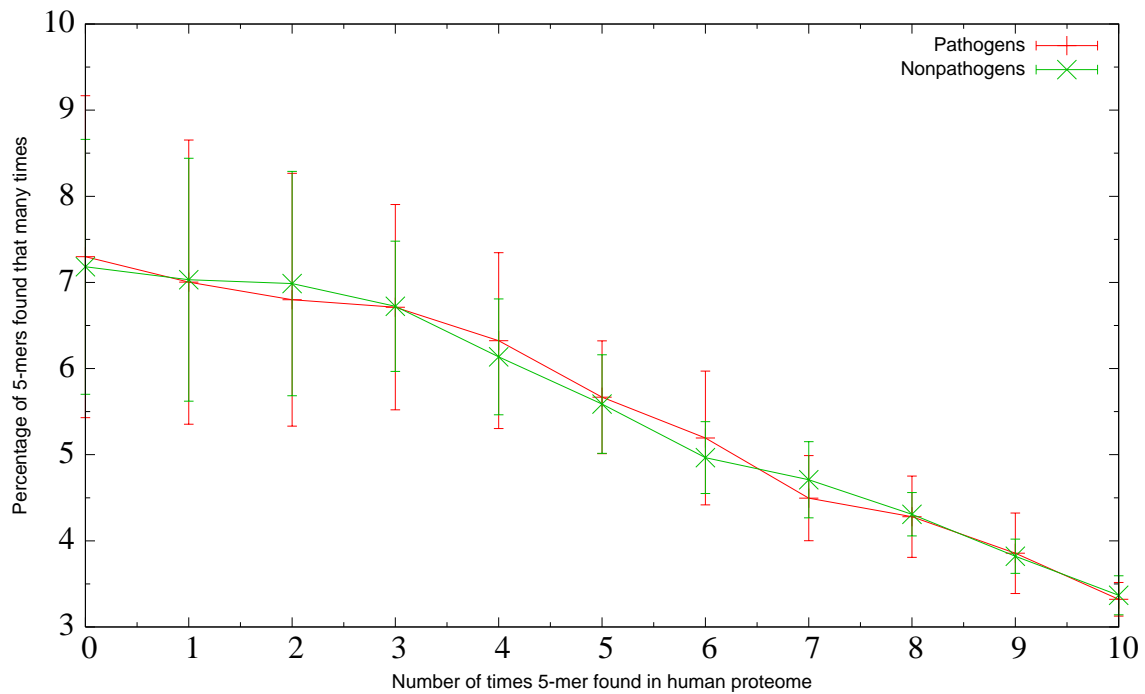

Supplement: pone.0034007.s001.pdf [file pone.0034007.s001.pdf]
