# Supplementary material for: Comparing the Similarity of Different Groups of Bacteria to the Human Proteome
Source: PubMed Central journal article supplement (PMC3338800; doi:10.1371/journal.pone.0034007), 2012-04-25

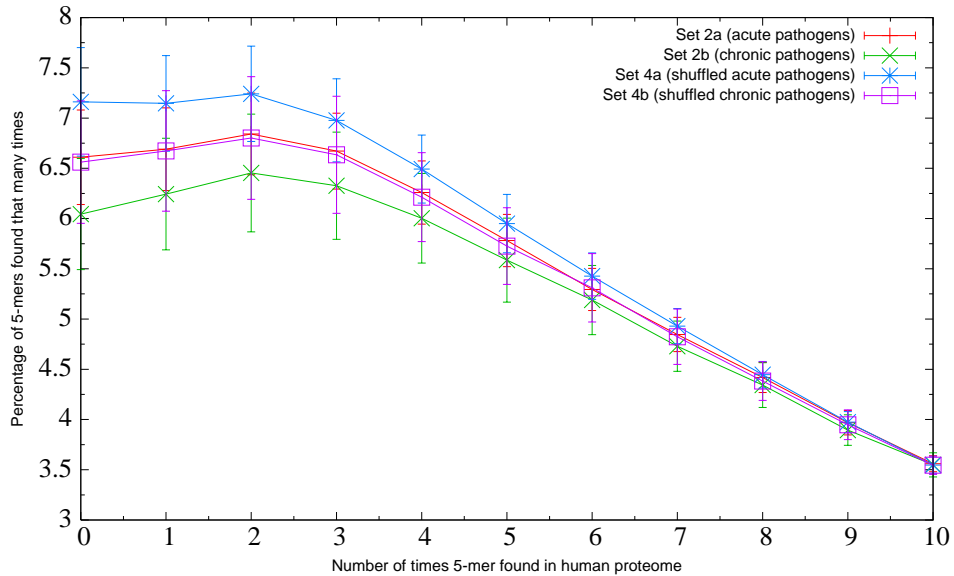

Supplement: pone.0034007.s003.pdf [file pone.0034007.s003.pdf]
